# Supplementary material
Source: publisher figshare collection journal article supplement (https://frontiersin.figshare.com/ndownloader/files/28105413)
Supplement: Supplementary file 1 [file 28105413]

## Supplementary Material

### Supplementary Figures

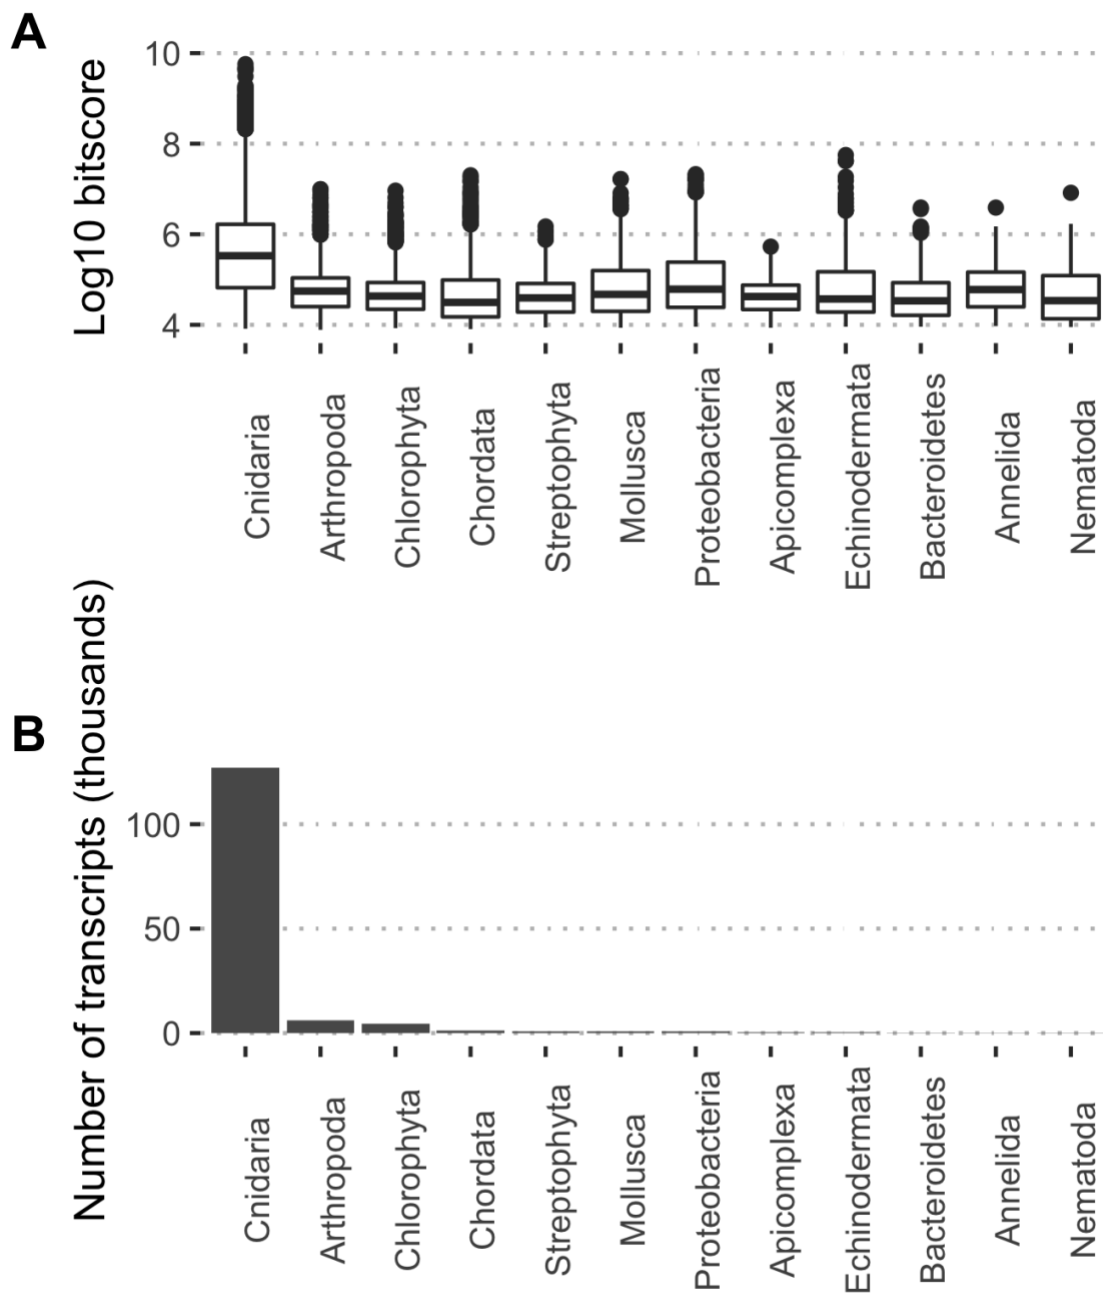

Supplementary Figure 4S. Phylum of origin for closest homologs of assembled transcripts in the *Porites cylindrica* transcriptome. A shows the distribution of homology scores (bitscore) for each Phylum. B shows the number of transcripts matching each phylum. Only phyla with at least 100 matches are shown.
